# Supplementary material for: Gelingt das Screening von Schwangeren auf HIV, Syphilis und Hepatitis B in Deutschland? Eine Analyse auf Basis von Routinedaten
Source: Springer Nature journal article supplement (doi:10.1007/s00103-020-03199-4), 2020-08-25
Supplement: MOESM1 [file 18313096]

## **Gelingt das Screening von Schwangeren auf HIV, Syphilis und Hepatitis B in Deutschland? Eine Analyse auf Basis von Routinedaten**

Sandra Beermann<sup>1</sup>; Josephine Jacob<sup>3</sup>; Sandra Dudareva<sup>2</sup>; Klaus Jansen<sup>2</sup>; Ulrich Marcus<sup>2</sup>;  
Ruth Zimmermann<sup>2</sup>; Viviane Bremer<sup>2</sup>

<sup>1</sup> Robert Koch-Institut, Zentrum für internationalen Gesundheitsschutz, Informationsstelle für Internationalen Gesundheitsschutz (INIG), Berlin, Deutschland

<sup>2</sup> Robert Koch-Institut, Abteilung für Infektionsepidemiologie, FG 34: HIV/AIDS und andere sexuell oder durch Blut übertragbare Infektionen, Berlin, Deutschland

<sup>3</sup> InGef - Institut für angewandte Gesundheitsforschung Berlin GmbH, Berlin, Deutschland

### **Korrespondenzadresse**

Dr. Sandra Beermann  
Robert Koch-Institut  
Zentrum für internationalen Gesundheitsschutz  
Informationsstelle für Internationalen Gesundheitsschutz (INIG)  
Nordufer 20  
13353 Berlin  
[beermanns@rki.de](mailto:beermanns@rki.de)

Inhalt:

**Tabelle A1: EBM-Ziffern und ICD-10-Diagnosen, die als Ausschlusskriterien verwendet wurden**

**Tabelle A2: Prozentuale Darstellung des Anteils durchgeführter Testungen auf Syphilis, HIV und Hepatitis B (HBV) in den Bundesländern**

**Tabelle A1: EBM-Ziffern und ICD-10-Diagnosen, die als Ausschlusskriterien verwendet wurden**

| <b>Merkmal</b>                     | <b>Katalog</b> | <b>EBM-Ziffern/ICD-10 Diagnose</b> | <b>Bezeichnung</b>                                                            |
|------------------------------------|----------------|------------------------------------|-------------------------------------------------------------------------------|
| Ausschlusskriterien                |                |                                    |                                                                               |
| HIV spezifische Leistungen         | EBM            | 30920                              | Zusatzpauschale für die Behandlung von HIV-Infizierten                        |
|                                    | EBM            | 30922                              | Zuschlag I zur Gebührenordnungsposition 30920 Behandlung von HIV-Infizierten  |
|                                    | EBM            | 30924                              | Zuschlag II zur Gebührenordnungsposition 30920 Behandlung von HIV-Infizierten |
| vorbestehende Syphilis Diagnose    | ICD-10         | A50                                | Syphilis connata                                                              |
|                                    | ICD-10         | A51                                | Frühsyphilis                                                                  |
|                                    | ICD-10         | A52                                | Spätsyphilis                                                                  |
|                                    | ICD-10         | A53                                | Sonstige und nicht näher bezeichnete Syphilis                                 |
| vorbestehende HIV Diagnose         | ICD-10         | O98.7                              | HIV-Krankheit die Schwangerschaft, Geburt und Wochenbett kompliziert          |
|                                    | ICD-10         | R75                                | Laborhinweis auf Humanes Immundefizienz-Virus                                 |
|                                    | ICD-10         | B20                                | Infektiöse und parasitäre Krankheiten infolge HIV-Krankheit                   |
|                                    | ICD-10         | B21                                | Bösartige Neubildungen infolge HIV-Krankheit                                  |
|                                    | ICD-10         | B22                                | Sonstige näher bezeichnete Krankheiten infolge HIV-Krankheit                  |
|                                    | ICD-10         | B23                                | Sonstige Krankheitszustände infolge HIV-Krankheit                             |
|                                    | ICD-10         | B24                                | Nicht näher bezeichnete HIV-Krankheit                                         |
|                                    | ICD-10         | Z21                                | Asymptomatische HIV-Infektion                                                 |
|                                    | ICD-10         | U60                                | Klinische Kategorien der HIV-Krankheit                                        |
|                                    | ICD-10         | U61                                | Anzahl der T-Helferzellen bei HIV-Krankheit                                   |
| vorbestehende Hepatitis B Diagnose | ICD-10         | B16                                | Akute Virushepatitis B                                                        |
|                                    | ICD-10         | B18                                | Chronische Virushepatitis                                                     |

**Tabelle A2: Prozentuale Darstellung des Anteils durchgeführter Testungen auf Syphilis, HIV und Hepatitis B (HBV) in den Bundesländern**

| Bundesland             | Anteil durchgeführter Testungen (%) |      |      |
|------------------------|-------------------------------------|------|------|
|                        | Syphilis                            | HIV  | HBV  |
| Baden-Württemberg      | 96,1                                | 85,4 | 94,2 |
| Bayern                 | 96,0                                | 89,3 | 93,8 |
| Berlin                 | 97,3                                | 85,6 | 94,7 |
| Brandenburg            | 96,6                                | 87,7 | 94,0 |
| Bremen                 | 96,0                                | 81,8 | 93,2 |
| Hamburg                | 95,0                                | 89,2 | 94,4 |
| Hessen                 | 96,4                                | 88,9 | 92,7 |
| Mecklenburg-Vorpommern | 94,9                                | 86,8 | 92,7 |
| Niedersachsen          | 95,9                                | 85,3 | 93,5 |
| Nordrhein-Westfalen    | 94,5                                | 80,0 | 94,0 |
| Rheinland-Pfalz        | 95,4                                | 85,7 | 93,7 |
| Saarland               | 96,7                                | 85,8 | 93,4 |
| Sachsen                | 97,5                                | 89,7 | 95,0 |
| Sachsen-Anhalt         | 96,8                                | 90,1 | 93,9 |
| Schleswig-Holstein     | 93,8                                | 81,0 | 91,6 |
| Thüringen              | 97,2                                | 82,5 | 92,9 |
